# Supplementary material
Source: publisher figshare collection journal article supplement (https://gsajournals.figshare.com/articles/dataset/_/11440986)
Supplement: Supplementary file 1 [file 1]

Figure S1

**A**

|               |                                                                |     |
|---------------|----------------------------------------------------------------|-----|
| <i>RPL22α</i> | ATGGTGCGTTTATTTTTCTTTTGATTTTCTCGTATCCCATGTAATCCTGATTGCAAA      | 60  |
| <i>RPL22a</i> | ATGGTGCGTTC-----CTTTTCTCATATCCCATGTAACCCCTCATTGCAAC            | 46  |
|               | *** ***** .*****.*****.***** ** *                              |     |
| <i>RPL22α</i> | CGTTTGCAACATTGGGTGACTGGCTCTTGTCCTAATCTTACCCATTTCGGCTAATATGA    | 120 |
| <i>RPL22a</i> | TTCTTGCAATTTTGGGTGT--GGATGCTGCGCTAAATTAGCCATTTCGGCTAACGTGT     | 104 |
|               | ***** :*****: **.* ** *****: ** *****.***:                     |     |
| <i>RPL22α</i> | CTCGTTTTCAAACAGCCGAAAGCTCCCTCCACTACCAAGAACGCAGCCGCTGGCAAGCCT   | 180 |
| <i>RPL22a</i> | CTTGTGTTCAAACAGCCGAAAGCTCCCTCCGCCGTAAGAACGCTGCCTCGGCAAGCCT     | 164 |
|               | ** ** *****.*****.***.*** *****:*** * *****                    |     |
| <i>RPL22α</i> | CTCCACAAGTTCTTCGTTGACTGCTCCGTCCCGTGAACGATTCTGTCTTCGACCTTGCC    | 240 |
| <i>RPL22a</i> | CTTACAAGTTCTACGTCGACTGCTCCGTCCCGTGAACGATTCTGTCTTCGACCTCGCC     | 224 |
|               | ** *****.*** ***** ***** ***** *                               |     |
| <i>RPL22α</i> | GCGTTTGAGAAGTTCTCCACGACCGCATCAAGGTCGACGGCAAGCCTGGCCAGCTCGGC    | 300 |
| <i>RPL22a</i> | GCTTTTGAGAAGTTTCTCCACGACCGCGTCAAGGTTGACGGCAAGCCCGGCCAGCTCGGC   | 284 |
|               | ** ***** *****.****** ***** ***** *                            |     |
| <i>RPL22α</i> | GACGTTGTCGCTGTCCAGAAGGAGG GTGAGTGTGCCCAAAAATCACTATTTGAATAATG   | 360 |
| <i>RPL22a</i> | GATGTCGTCGCTGTCCAGAAGGAGG GTCAGTACGCCCGAAAAGTTAGTAGATGAGTTGTG  | 344 |
|               | ** ** *******.*.***.****.* ** *:***.*:**                       |     |
| <i>RPL22α</i> | TTCTGATGGTCGTTGCACAGGTGCCAAGATCGTCCTCACTTCCCAAATCCCATTCTCCAA   | 420 |
| <i>RPL22a</i> | TTCTGATGGTTGTTTACAGGTGCCAAGATGTCTTACCTCTCAAATCCCCTTCTCCAA      | 404 |
|               | ***** ** ***** ***** ** ** *****.*****                         |     |
| <i>RPL22α</i> | GAGGTACCTCAAGTACCTTACGAAGAAGCACTTGAAGAAGAACTCTTTTGAAAACCTTCCT  | 480 |
| <i>RPL22a</i> | GAGGTATCTTAAGTACCTTACCAAGAAACACTTGAAGAAGAACTCTTTCGAGAACCTTCCT  | 464 |
|               | ***** * ***** *****.*****.***** ** *****                       |     |
| <i>RPL22α</i> | CCG GTTAGTCATGTGTAACACCGCTGATATTATATATTAACATTTCTACAGCGTCGTTGC  | 540 |
| <i>RPL22a</i> | CCG GTTAGTAACGTGTAGATACATTGATACTATATACTGATTGCCTCATAGTGTCTGTTGC | 524 |
|               | *****.* *****.*.***.***** *****.*.*: ** *****                  |     |
| <i>RPL22α</i> | CACTTCCAAGGACACCTATTCCTCAAGTACTTCAAGGTTGATCAGGATGAAGCTGAGGA    | 600 |
| <i>RPL22a</i> | CACTTCCAAGGACACTTATTCCTCAAATACTTCAAGGTTGACCAAGATGAAGCTGAGGA    | 584 |
|               | ***** *****.***** ***** ** *****                               |     |
| <i>RPL22α</i> | GGATGAACTCGCTTAA                                               | 616 |
| <i>RPL22a</i> | GGATGAACTCGCCTAA                                               | 600 |
|               | ***** **                                                       |     |

**B**

|        |        |         |          |         |                     |                |    |
|--------|--------|---------|----------|---------|---------------------|----------------|----|
|        | 1      | 10      | 20       | 30      | 40                  | 50             | 60 |
| Rpl22α | MPKAPS | TKNAAP  | AGKPLHKE | FVDCSVP | VNDSVFDLAAFEKFLHDRV | KVDGKPGQLGDVVA |    |
| Rpl22a | MPKAPS | AAKNAAP | SGKPLHKE | FVDCSVP | VNDSVFDLAAFEKFLHDRV | KVDGKPGQLGDVVA |    |
|        | *****  | *****   | *****    | *****   | *****               | *****          |    |

**Figure S1.** Alignment between *C. neoformans* *RPL22α* and *RPL22a*. DNA sequence (A), and Rpl22α and Rpl22a proteins (B). In A introns are highlighted in red, and nucleotide changes that result in different amino acids between the Rpl22α and Rpl22a proteins are color coded with the corresponding amino acids boxed and highlighted in the same color in B. In B only the initial 60 amino acids are shown. Both in A and B, an asterisk (\*) indicates positions which have a single, fully conserved residue, a colon (:) indicates conservation between groups of strongly similar properties - scoring > 0.5 in the Gonnet PAM 250 matrix, and a period (.) indicates conservation between groups of weakly similar properties - scoring ≤ 0.5 in the Gonnet PAM 250 matrix.

**Figure S2**

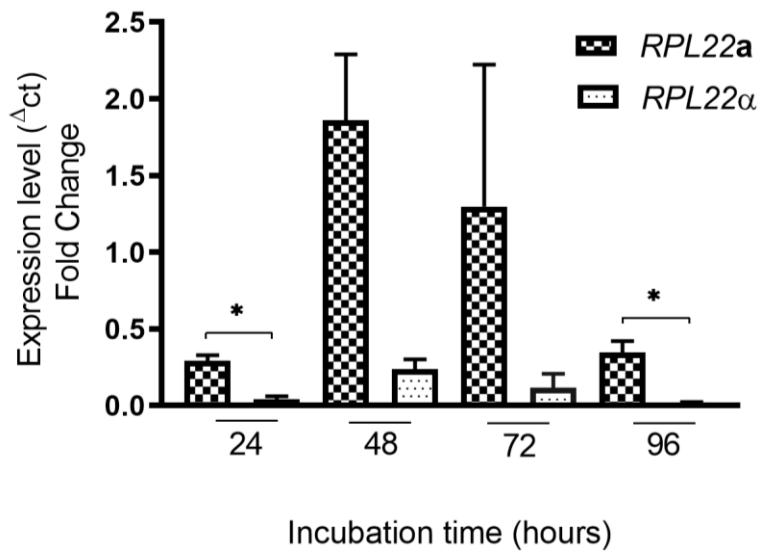

**Figure S2** Expression of *RPL22α* and *RPL22a* during vegetative growth of *C. neoformans*. WT strains H99α and KN99a were grown in YPD media for 24, 48, 72 and 96 h. Ct values were converted to expression level (fold change) through comparison with the endogenous reference *GDP1* ( $\Delta$ ct analysis). The data presented in this supplemental figure were used as comparative condition to calculate the expression levels of *RPL22α* and *RPL22a* during H99α x KN99a mating of Figure 4A. Asterisk indicates  $p < 0.05$  for each *RPL22α* and *RPL22a* comparison for the same day of incubation.

**Figure S3**

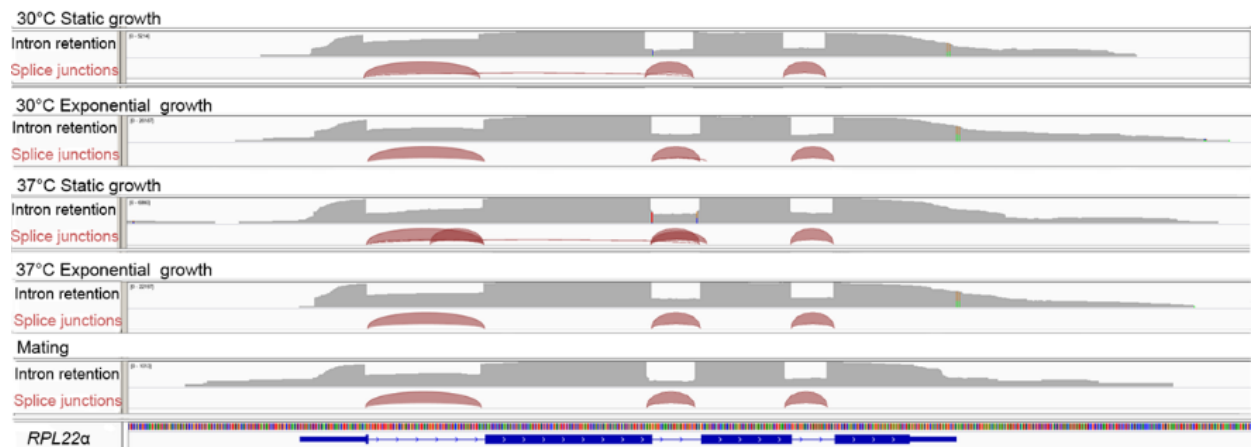

**Figure S3.** Intron retention and splice junction analysis for *RPL22α* following growth in several conditions. High retention of intron 1 at 30°C static growth. Detected alternative splicing at intron 1 and 2 at 37°C static growth.

**Figure S4**

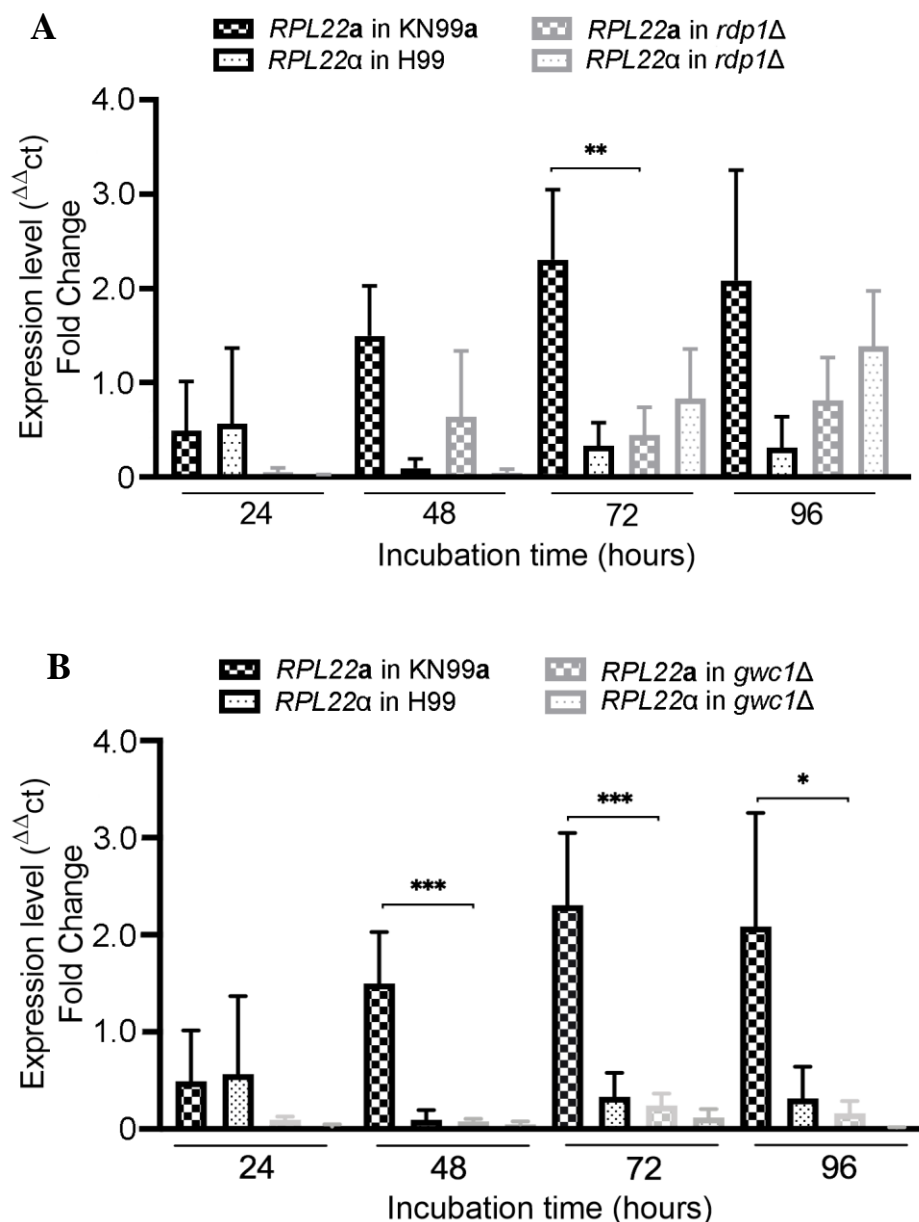

**Figure S4.** Comparison of the expression levels of *RPL22α* and *RPL22a* in WT and RNAi mutants. RT-qPCR data from Figures 4A, 4C and 4D, were replotted to allow direct comparison of the *RPL22α* and *RPL22a* expression levels during WT H99α x KN99a cross compared to *rdp1Δ* (A) and *gwc1Δ* (B) bilateral crosses for 24, 48, 72 and 96 h of incubation. Statistical analysis was carried out using one-way ANOVA with Tukey's multiple comparison test. Because on these comparisons we were interested in monitoring the changes in gene

expression following genetic manipulation, we display only statistically significant differences (\* for  $p < 0.05$ , \*\* for  $p < 0.01$ , and \*\*\* for  $p < 0.001$ ) of the expression levels of the same gene for the same day of incubation in separate mating reactions.

**Figure S5**

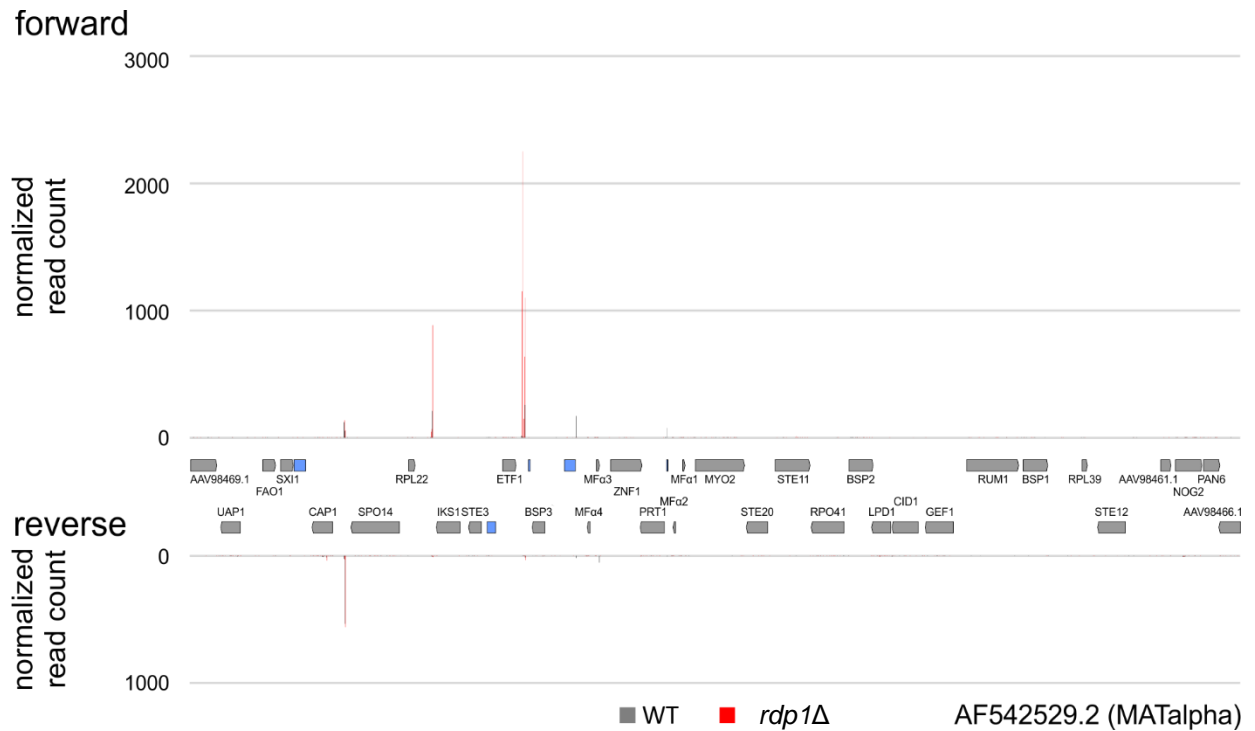

**Figure S5.** sRNA obtained during H99 $\alpha$  x KN99 $\alpha$  cross (black) and *rdp1*Δ *MAT* $\alpha$  x *rdp1*Δ *MAT* $\alpha$  bilateral cross (red) were mapped to the reference *MAT* $\alpha$  locus of *C. neoformans* (accession number AF542529.2). Genes are represented in grey in the middle panel, and the *LTR* and transposable elements are in blue.

Figure S6

A

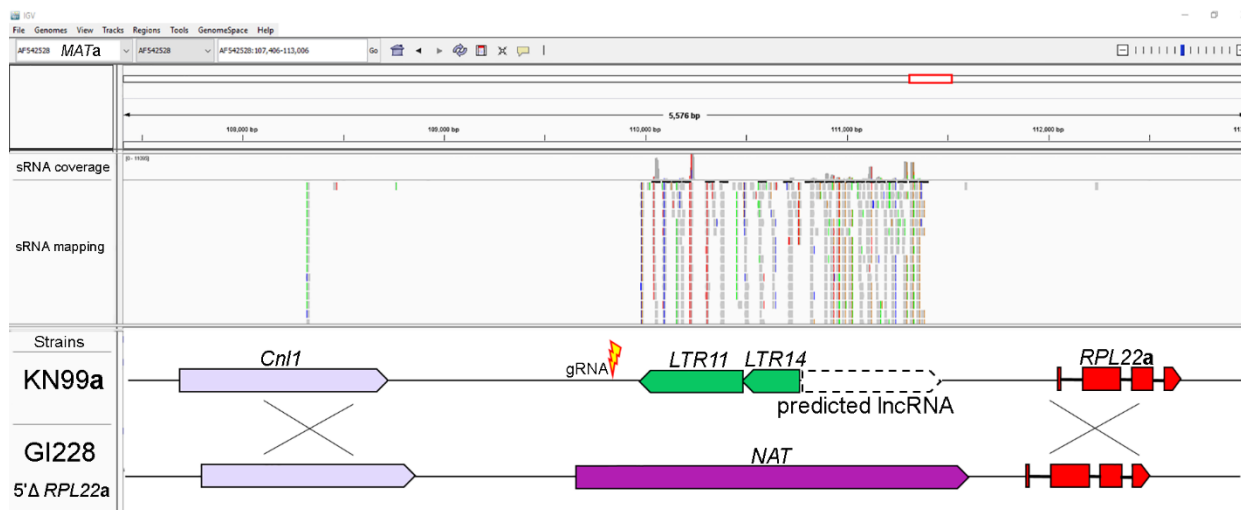

B

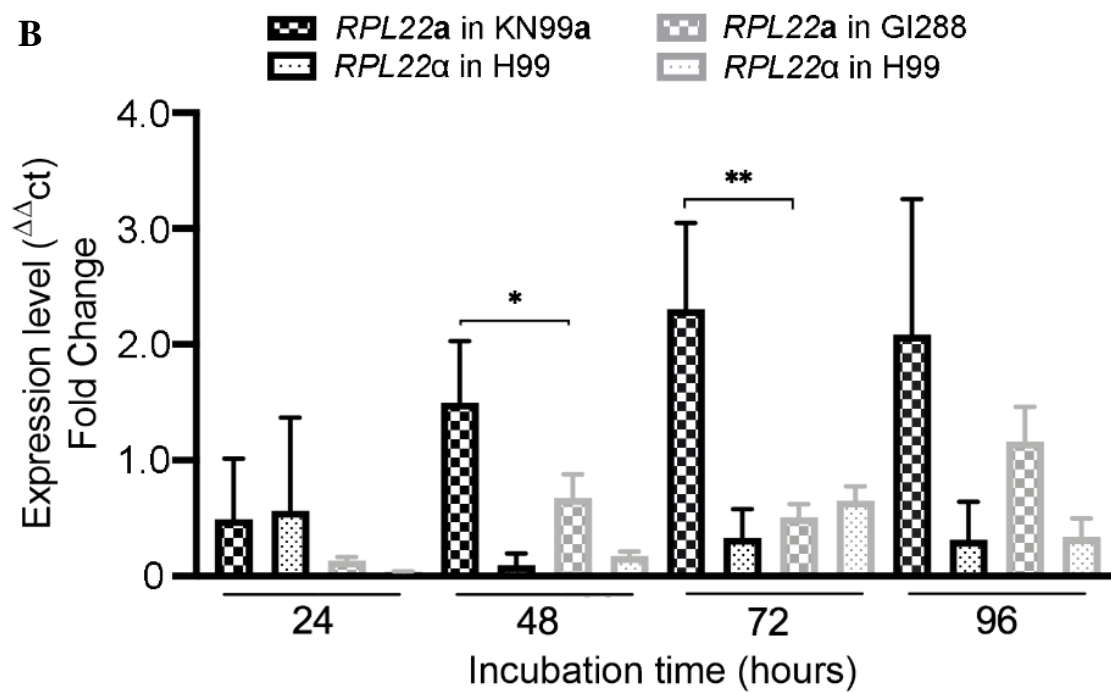



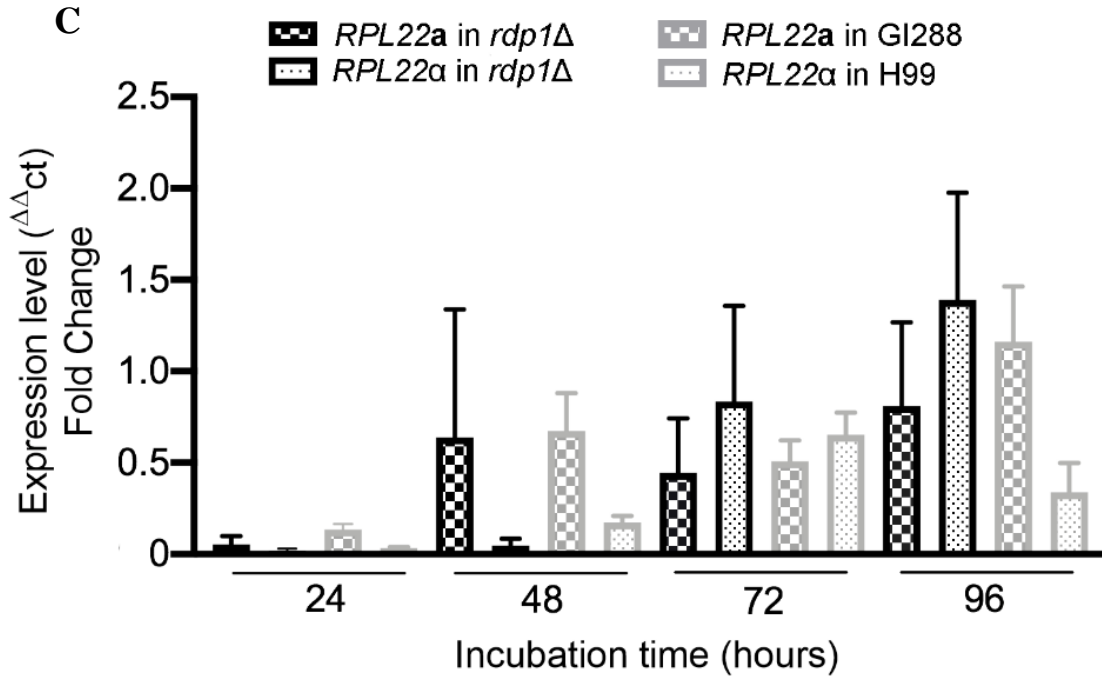

**Figure S6.** Analysis of 5' control element of *RPL22a* gene during sexual reproduction. (A) Schematic representation of the CRISPR/Cas9 strategy used to generate strain *C. neoformans* GI288 (5'  $\Delta$  *RPL22a*) through deletion of the region targeted by sRNA upstream *RPL22a* during H99 $\alpha$  x KN99 $\alpha$  cross. (B) RT-qPCR data from Figures 4A and 4D were replotted to allow direct comparison of the *RPL22a* and *RPL22α* expression levels during WT H99 $\alpha$  x KN99 $\alpha$  cross compared to GI288 $\alpha$  (5'  $\Delta$  *RPL22a*) x H99 $\alpha$  cross for 24, 48, 72, and 96 h of incubation. (C) RT-qPCR data from Figures 4C and 4D were replotted to allow direct comparison of the *RPL22a* and *RPL22α* expression levels during *rdp1Δ* bilateral cross compared to GI288 x H99 cross for 24, 48, 72 and 96 h of incubation. For both B and C, statistical analysis was carried out using one-way ANOVA with Tukey's multiple comparison test. These comparisons were to monitor the changes in gene expression following genetic manipulation, and only statistically significant differences of the expression levels of the same gene in the same day of incubation in separate mating reactions are displayed (\* for  $p < 0.05$ , and \*\* for  $p < 0.01$ ).

**Figure S7**

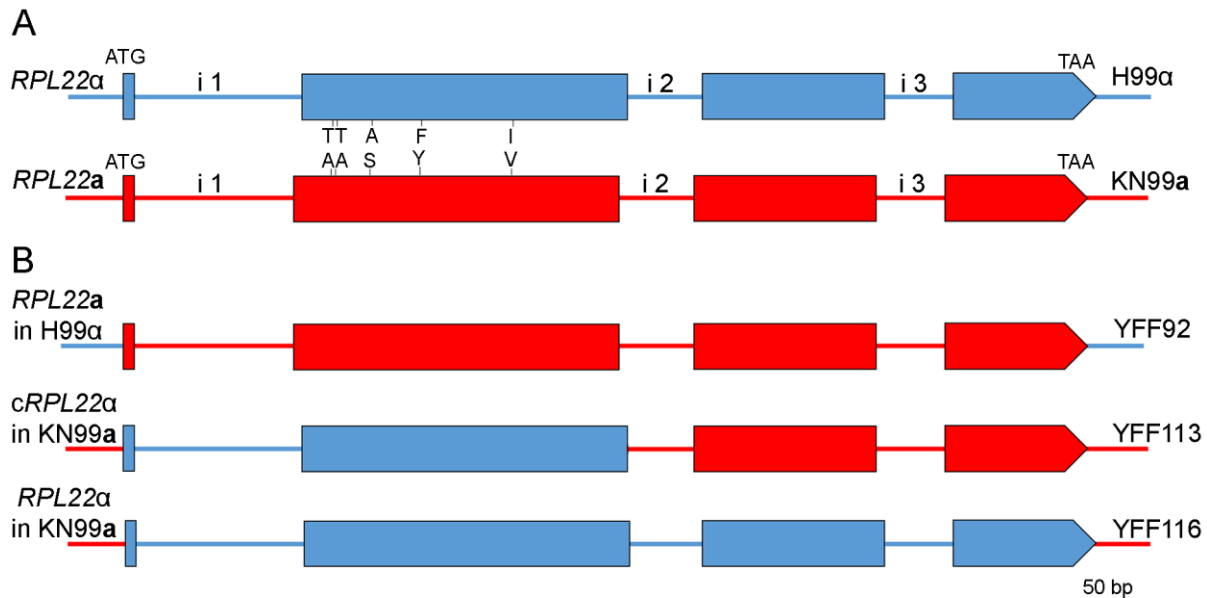

**Figure S7.** Features of the *RPL22α* and *RPL22a* genes in *C. neoformans* WT H99α and KN99a (A), respectively, and in the *RPL22* exchange strains YFF92, YFF113, and YFF116 (B). Boxes represent exons. The start and stop codons, the different amino acids between the Rpl22α and Rpl22a proteins, and the introns (“ i ”) are indicated. The chimeric *RPL22α* is indicated as *cRPL22α* (c = chimera).

**Figure S8**

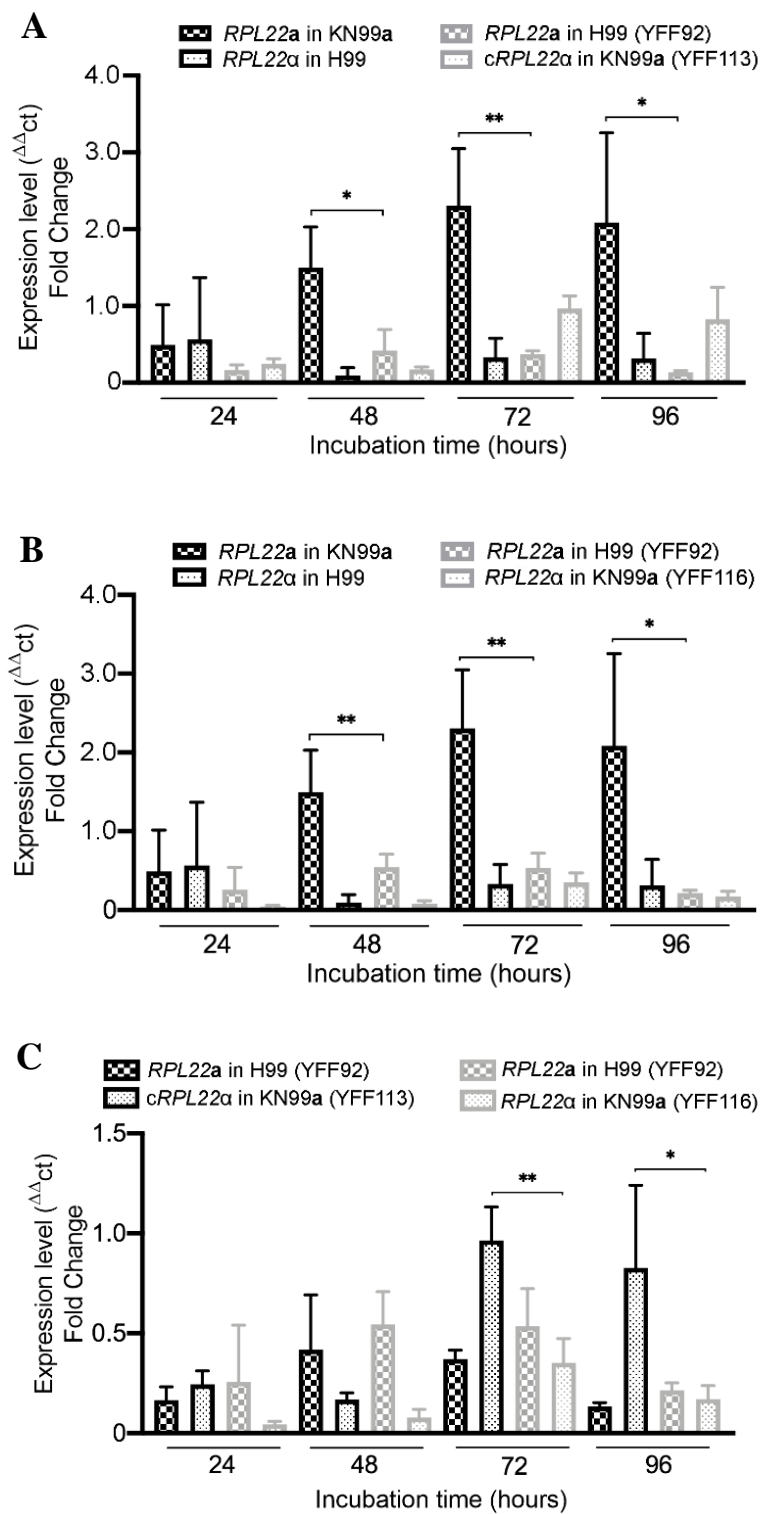

**Figure S8.** Comparison of the expression levels of *RPL22α*, *cRPL22α*, and *RPL22a* during mating in the *RPL22* exchange strains. (A) RT-qPCR data from Figure 4A and Figure 5D were

replotted to allow direct comparison of the *RPL22α* and *RPL22a* expression levels during WT H99α x KN99a cross compared to *cRPL22α* and *RPL22a* expression levels during YFF92α x YFF113a cross for 24, 48, 72, and 96 h of incubation. (B) RT-qPCR data from Figure 4A and Figure 6B were replotted to allow direct comparison of the *RPL22α* and *RPL22a* expression levels during WT H99α x KN99a cross compared to YFF92α x YFF116a cross for 24, 48, 72, and 96 h of incubation. (C) RT-qPCR data from Figure 5D and Figure 6B were replotted to allow direct comparison of the *RPL22α* and *RPL22a* expression levels during YFF92α x YFF116a cross compared to *cRPL22α* and *RPL22a* expression levels during YFF92α x YFF113a cross for 24, 48, 72, and 96 h of incubation. Statistical analysis was carried out using one-way ANOVA with Tukey's multiple comparison test. Because in these comparisons we were interested in monitoring the changes in gene expression following genetic manipulation, we display only statistically significant differences (\* for  $p < 0.05$ , and \*\* for  $p < 0.01$ ) of the expression levels of the same gene in the same day of incubation in separate mating reactions.

**Figure S9**

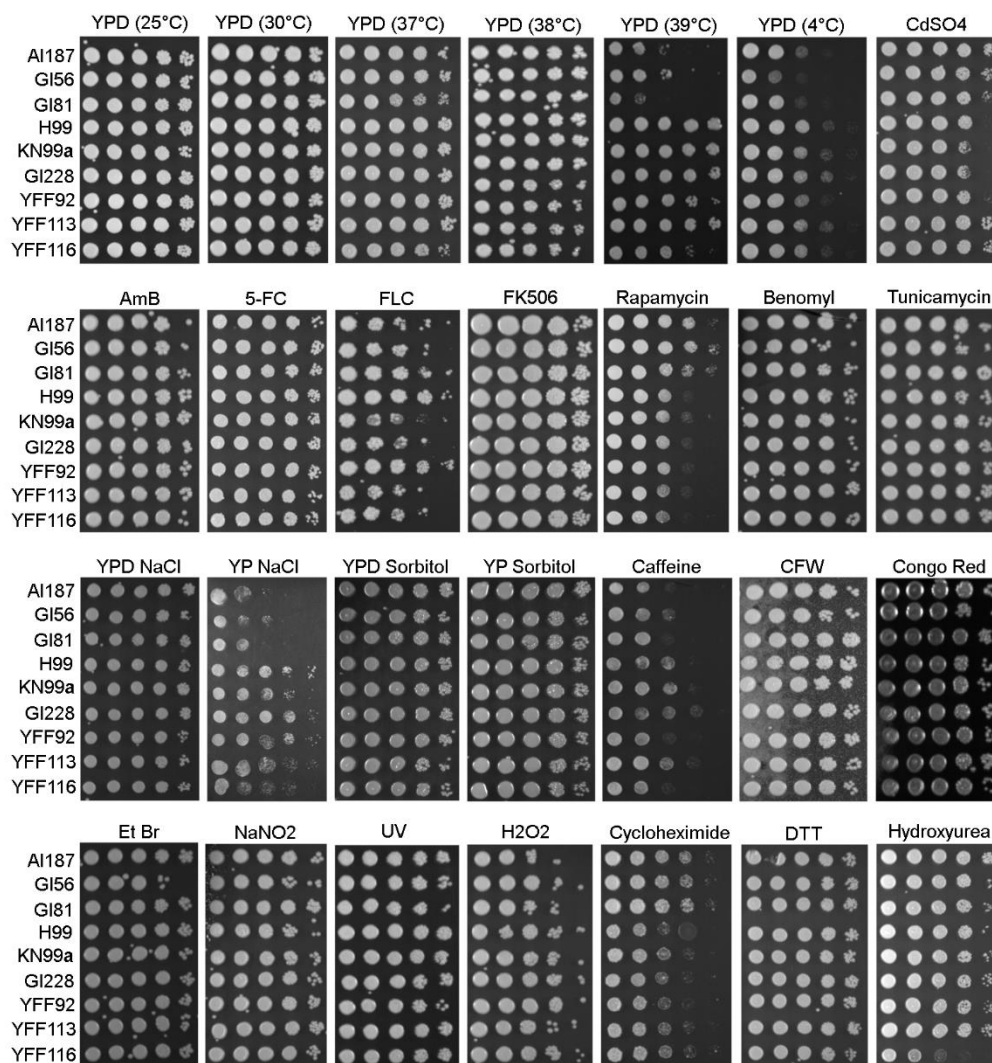

**Figure S9.** Phenotypic analysis of the *C. neoformans* heterozygous and mutant strains generated in this study (Table S1) on several stressors. For details see materials and methods.

**Figure S10**

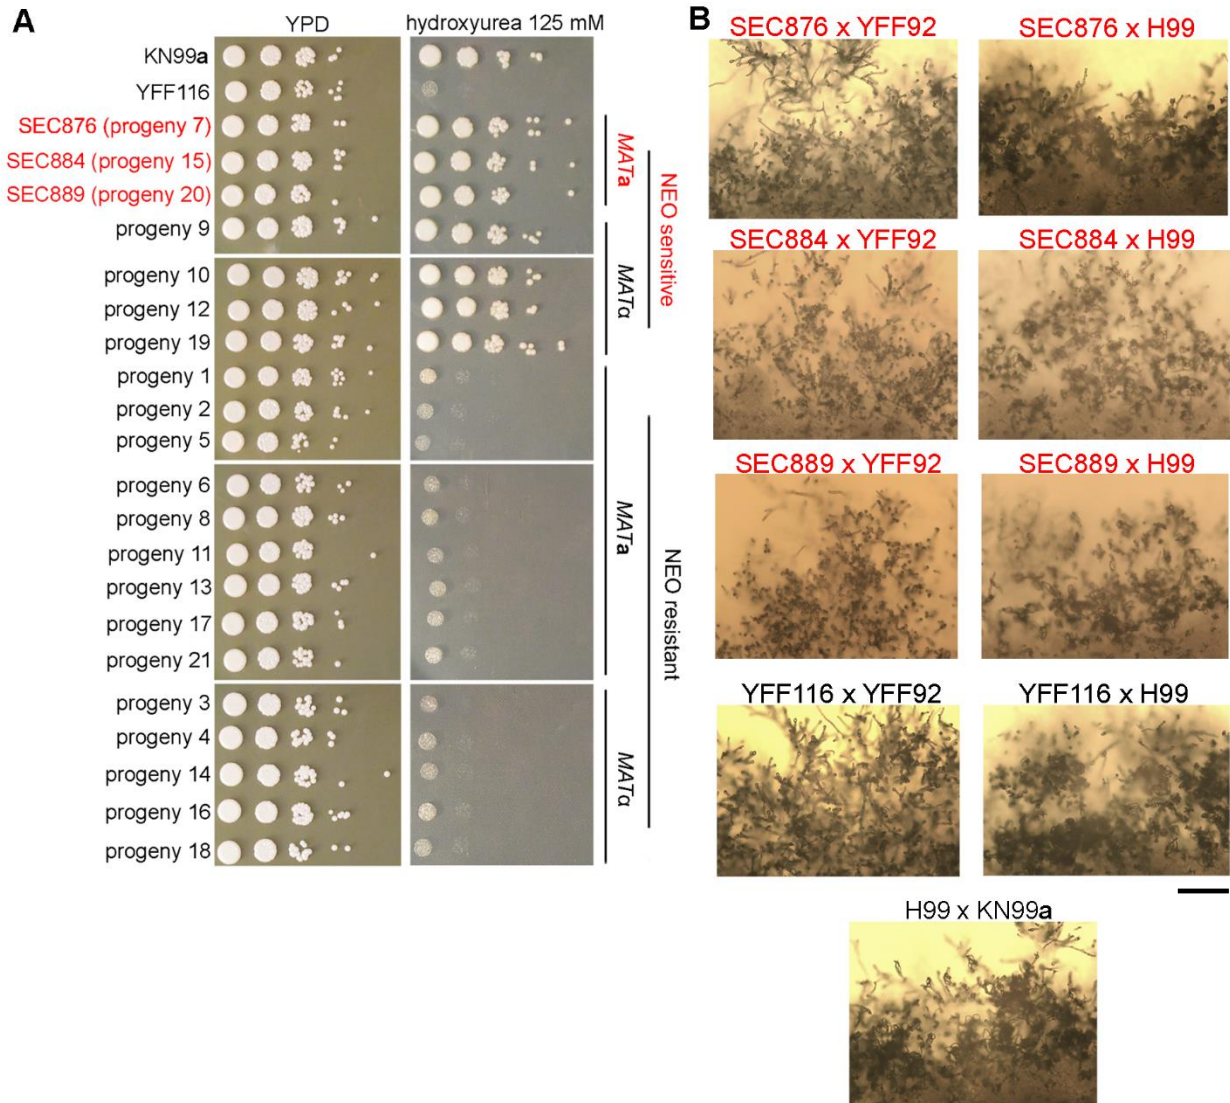

**Figure S10.** Genetic analysis of the markers segregating following the cross H99 x YFF116. 21 progeny that germinated after microdissection were 10-fold serially diluted and spotted on 125 mM hydroxyurea. NEO<sup>S</sup> MATa progeny 7 (SEC876), progeny 15 (SEC884), and progeny 20 (SEC889) were crossed with H99 and YFF92; control crosses were YFF116 x YFF92, YFF116 x H99 $\alpha$ , and H99 $\alpha$  x KN99a. Mating structures were photographed after 3 weeks on MS medium. The scale bar is 100  $\mu$ m.

**Figure S11**

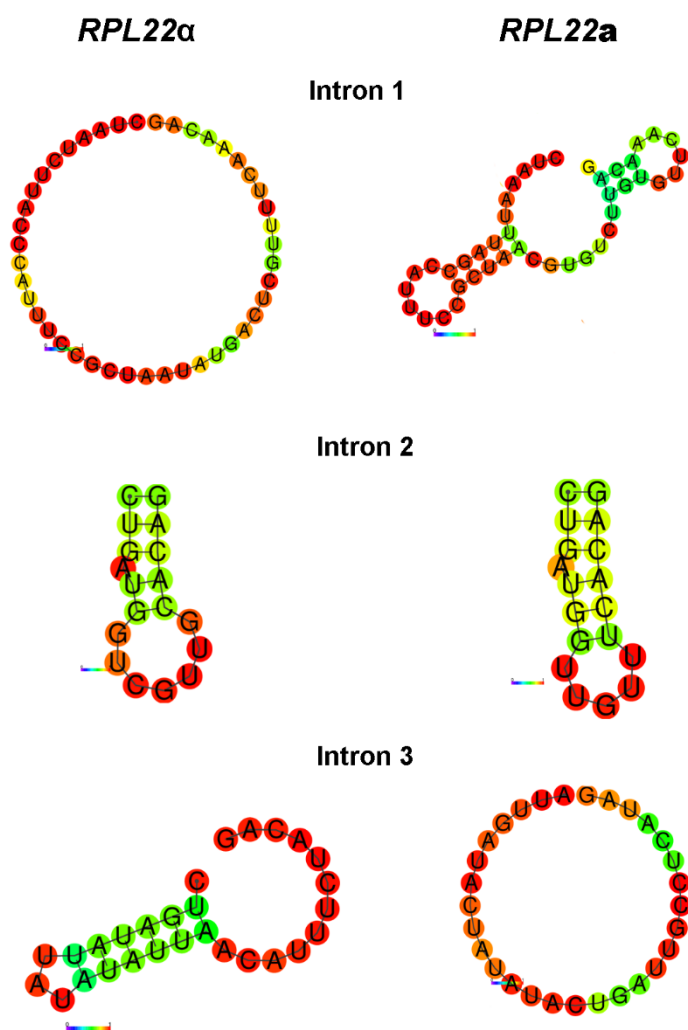

**Figure S11.** RNAfold secondary structure prediction of the regions including the branch sites and the acceptor sites of introns 1, 2, and 3 of the *RPL22α* and *RPL22a* genes.
