# Supplementary material
Source: publisher figshare collection journal article supplement (https://gsajournals.figshare.com/articles/dataset/_/11440986)

File S3

# Morphological analysis of YFF116 x H99 (only *RPL22α*) strains during mating

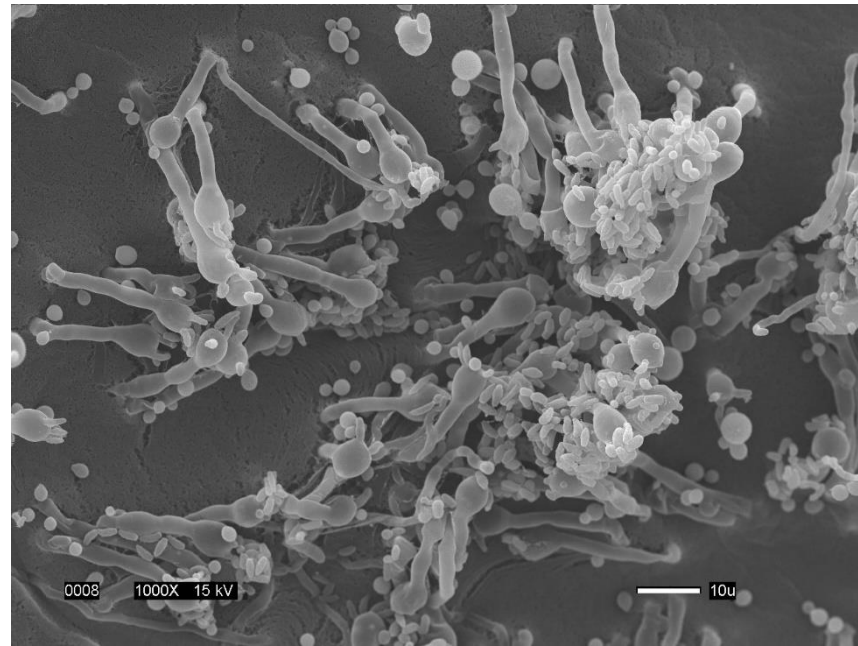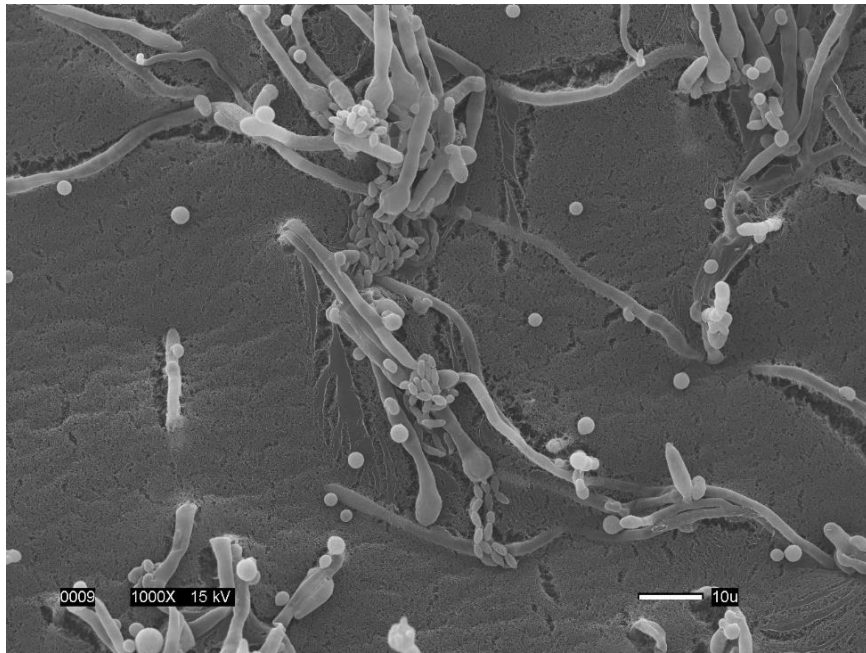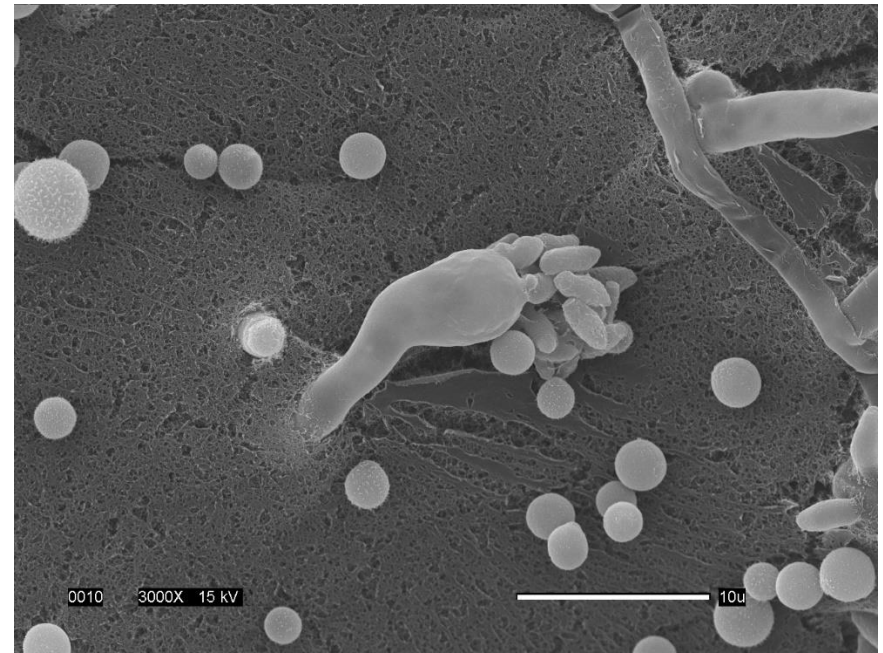

# Morphological analysis of *RPL22* exchange strains (YFF92 x YFF116) during mating

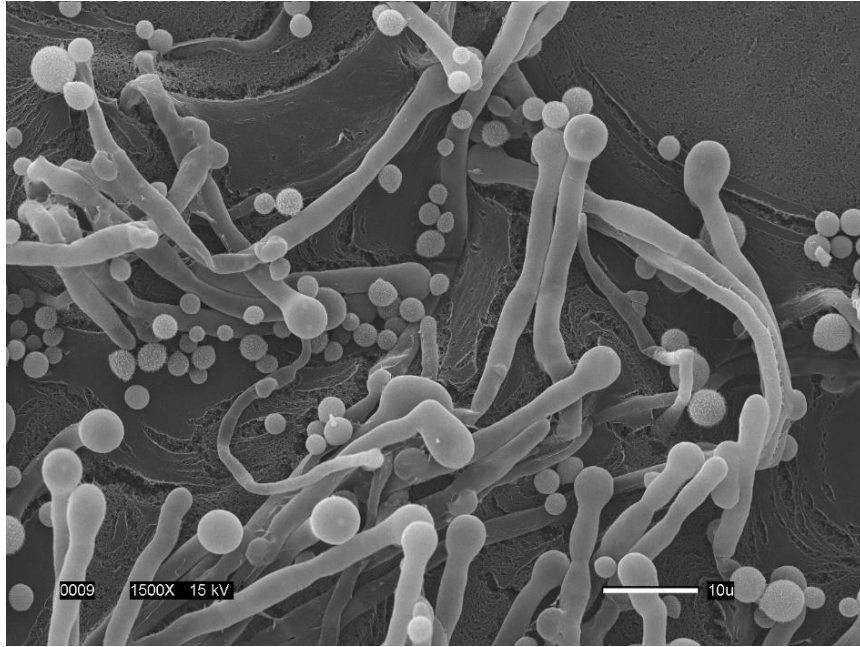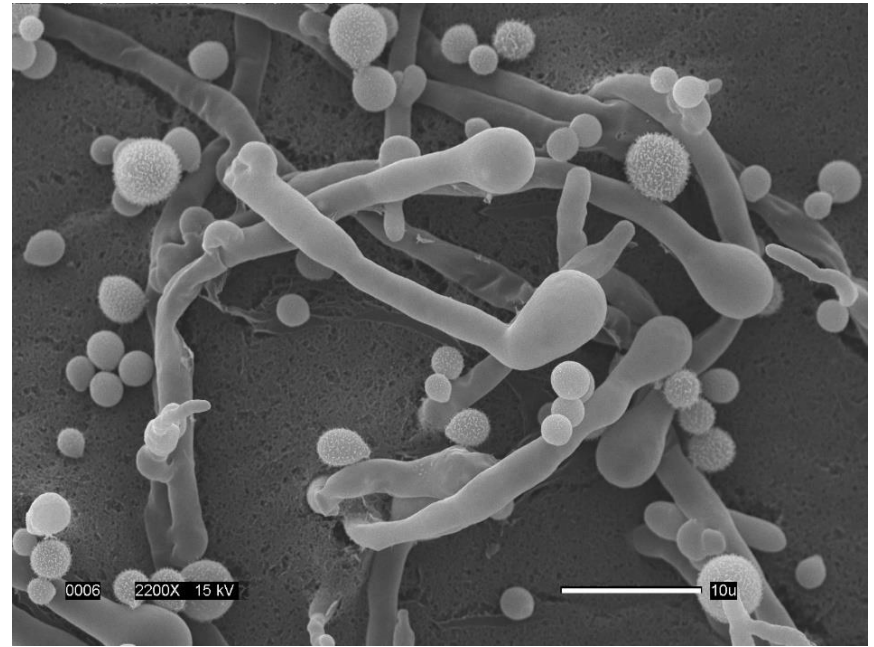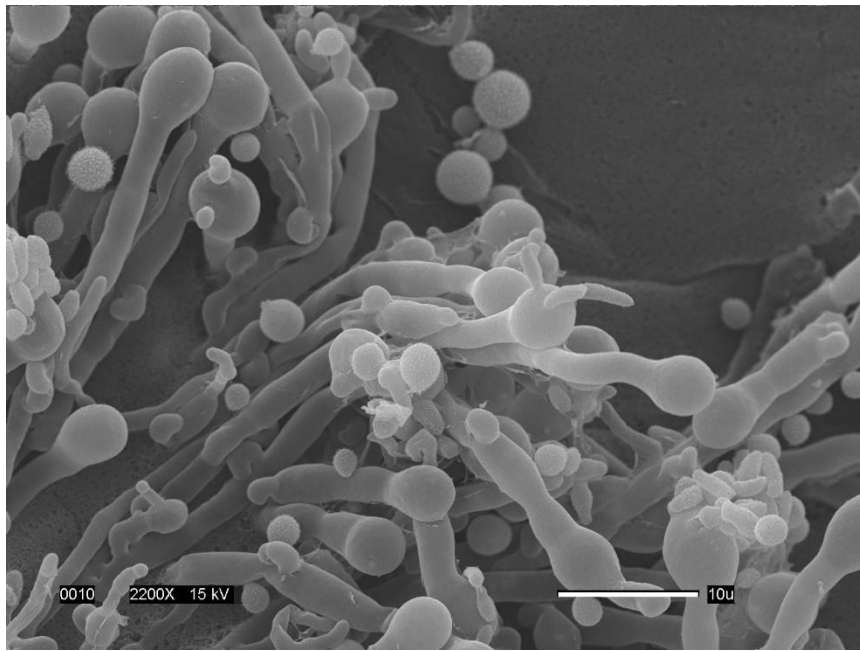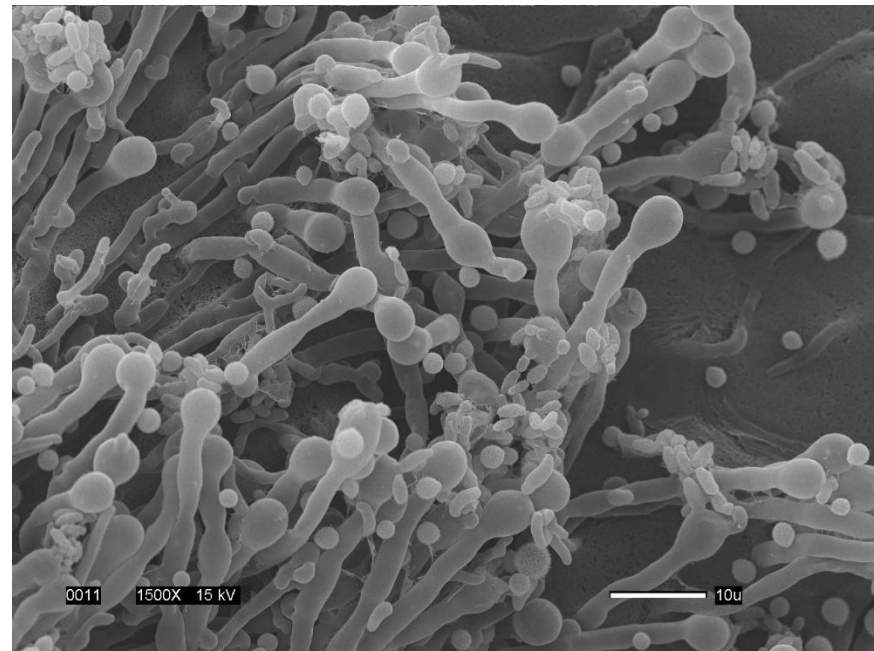



# Morphological analysis of *RPL22* exchange strains (YFF92 x YFF116) during mating

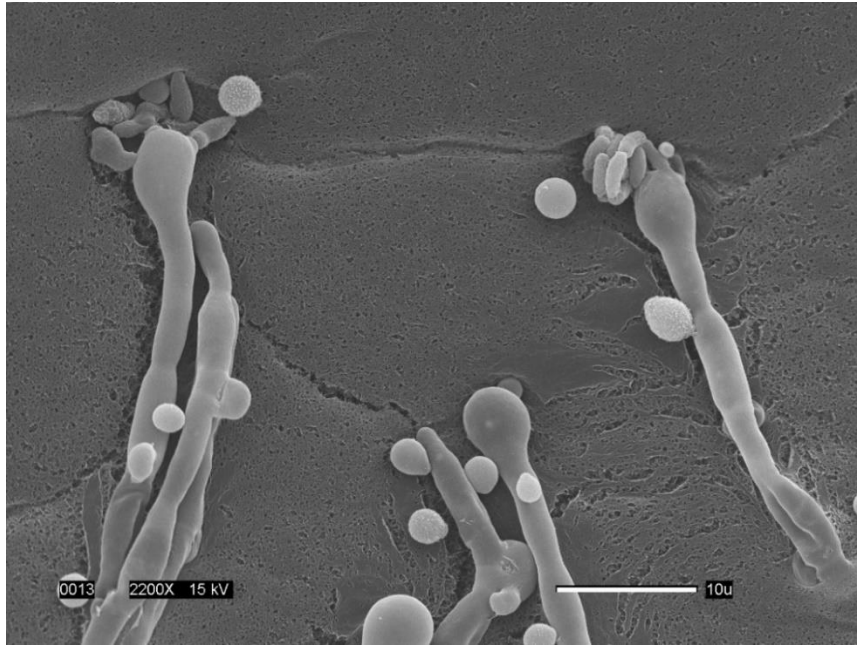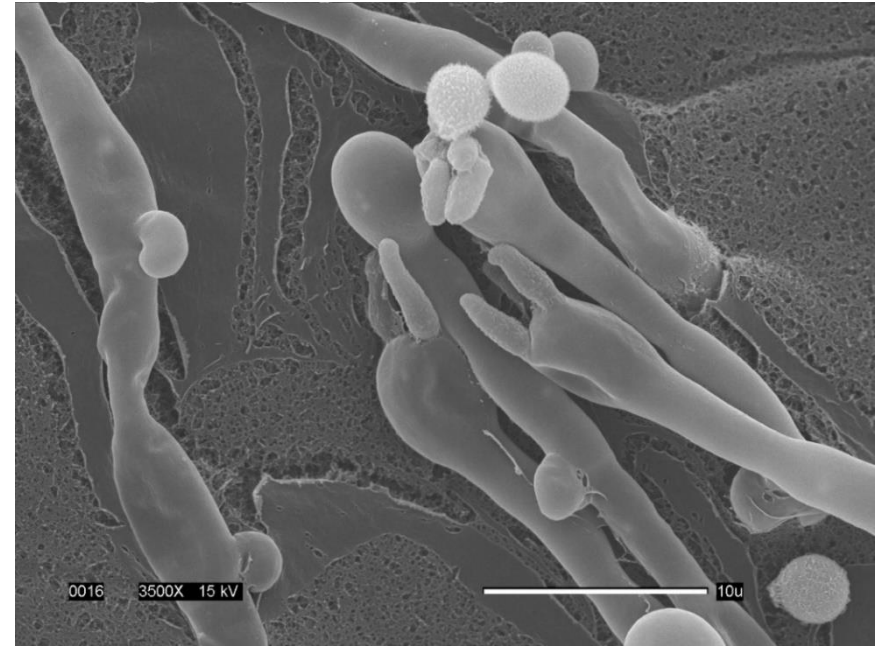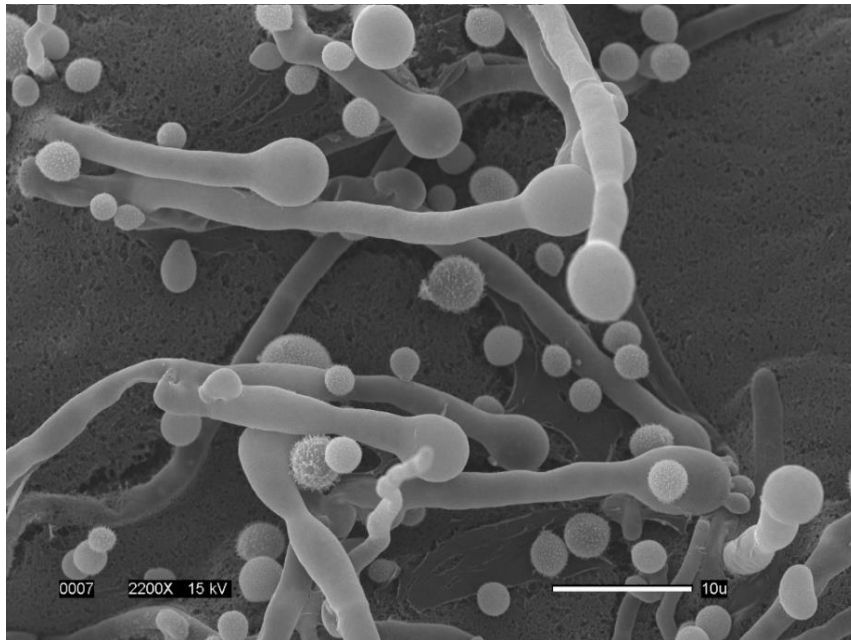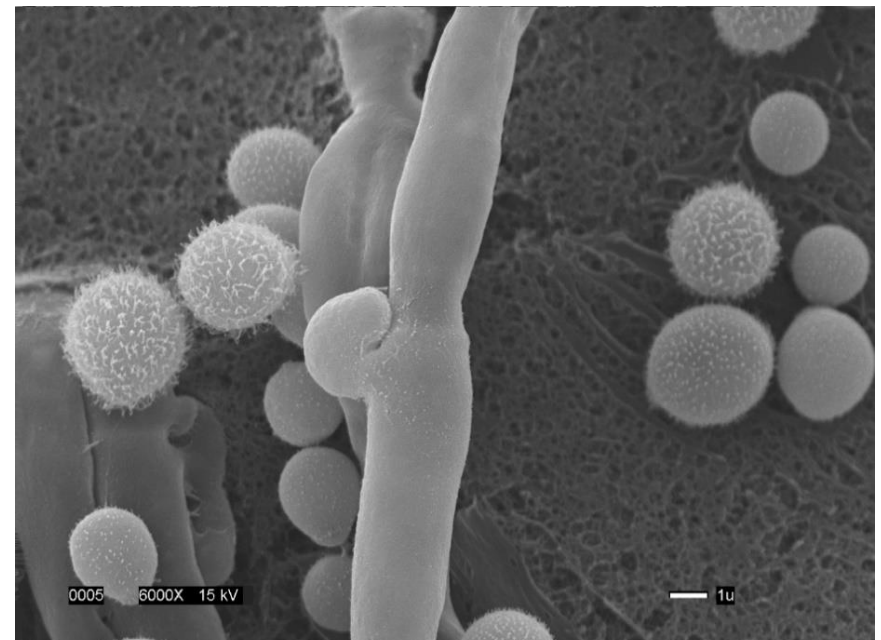



# Formation of irregular basidiospores chains during YFF92 x YFF116 mating

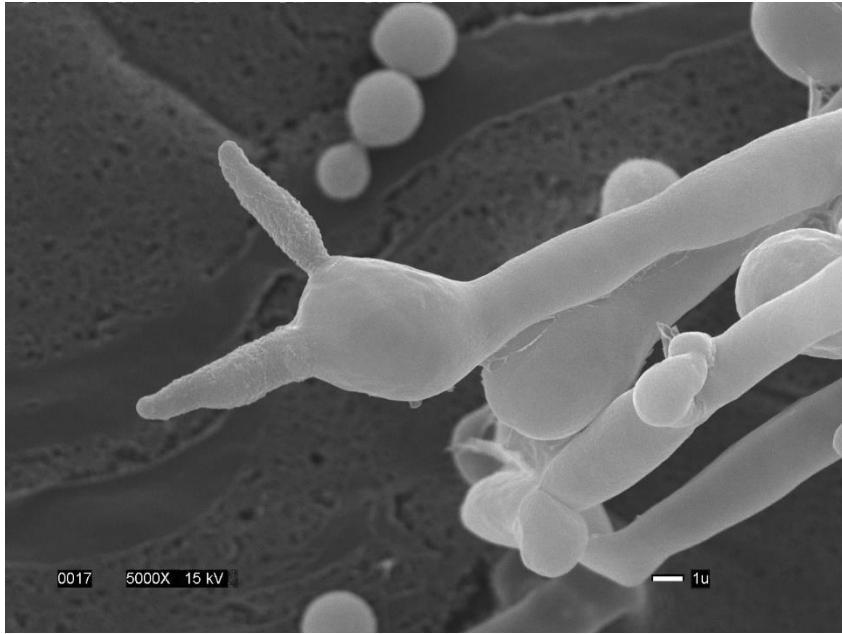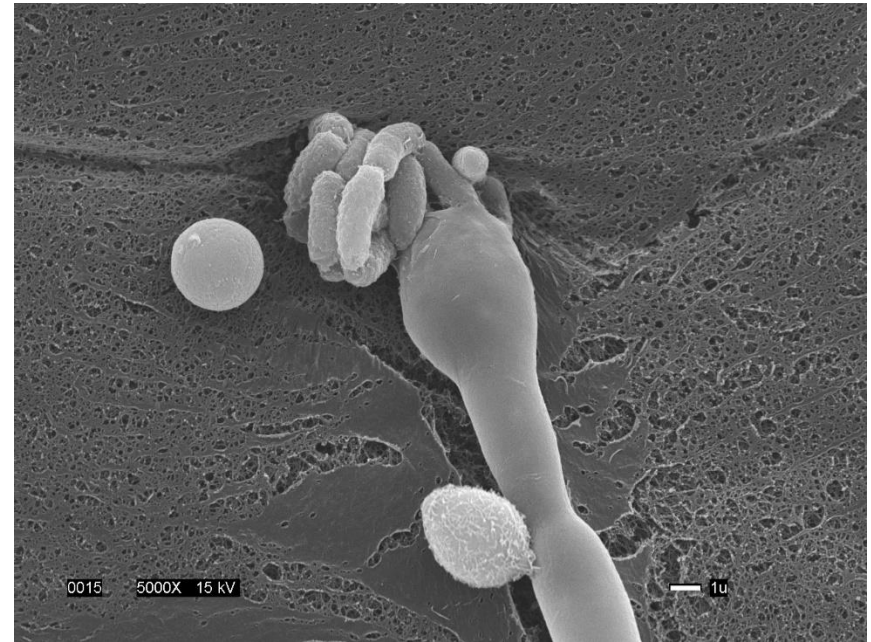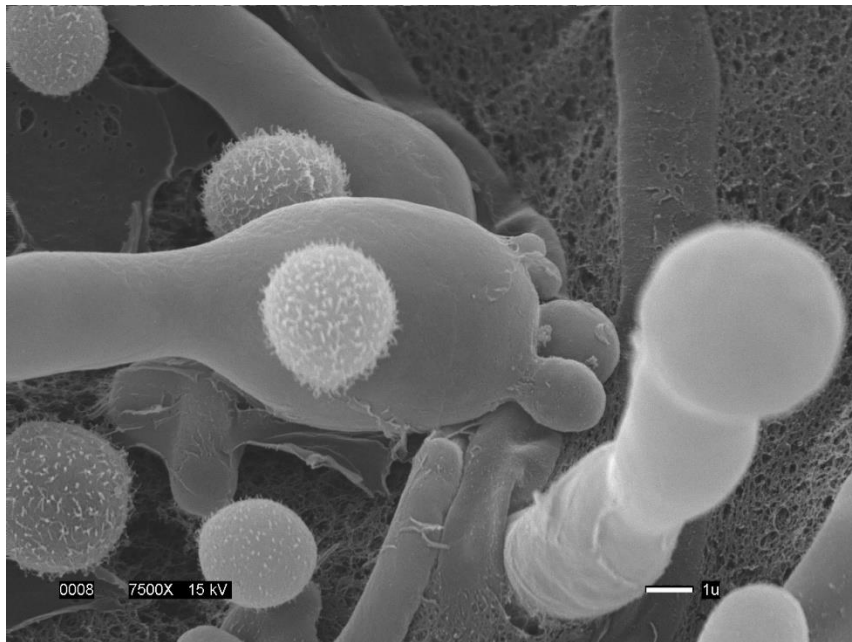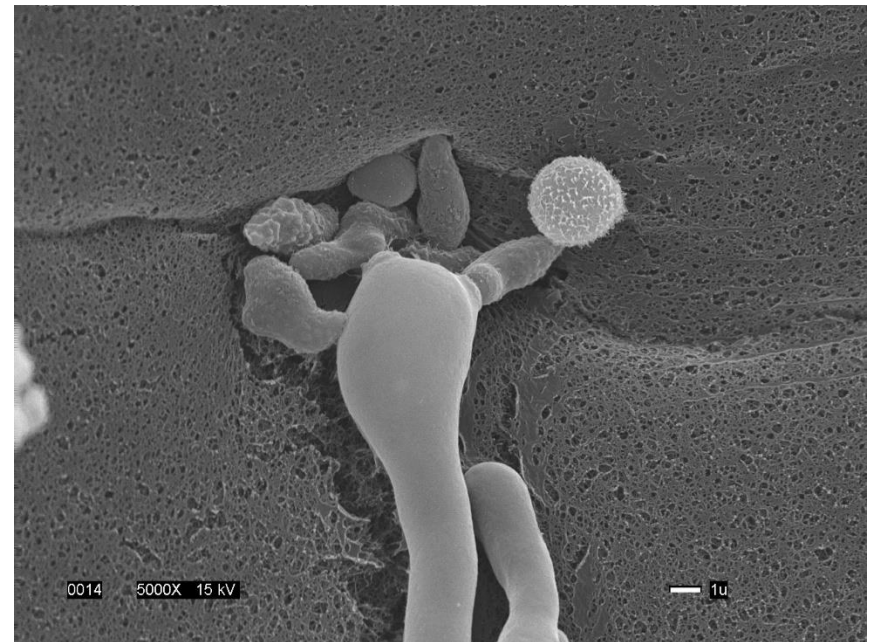

Supplement: Supplementary file 2 [file 1]
