# Supplementary material
Source: publisher figshare collection journal article supplement (https://gsajournals.figshare.com/articles/dataset/_/11440986)

File S2

# Morphological analysis of WT strains during mating

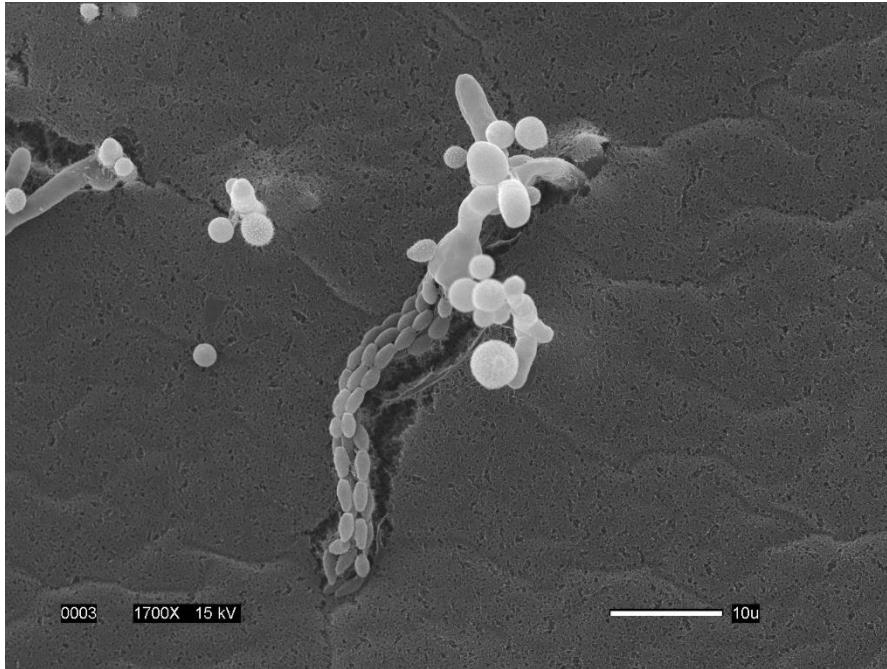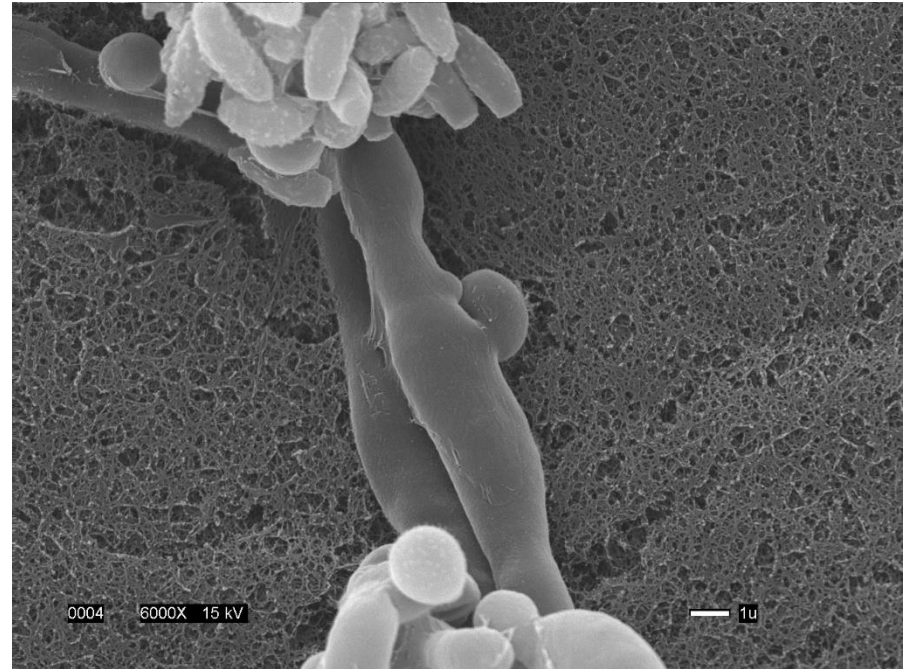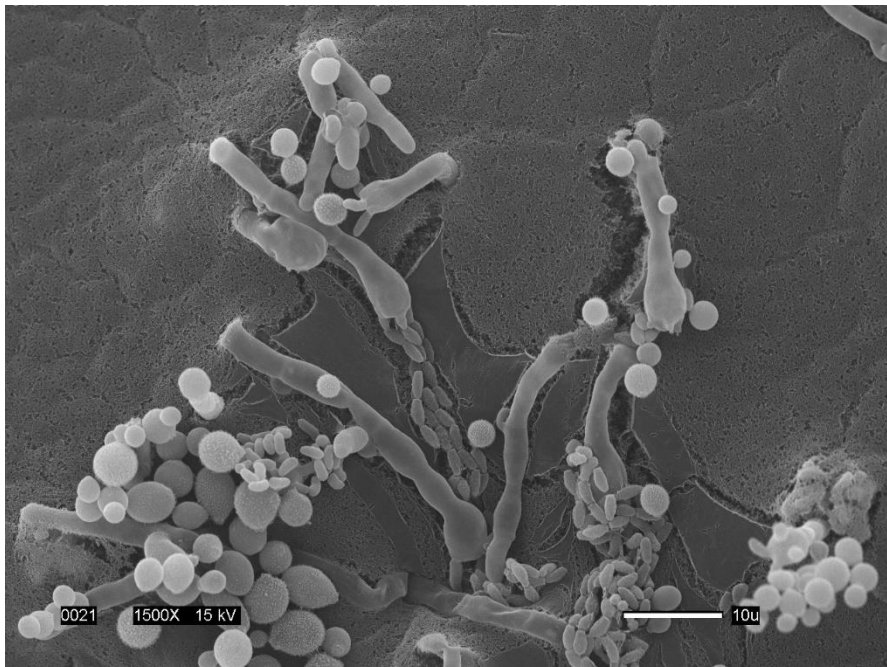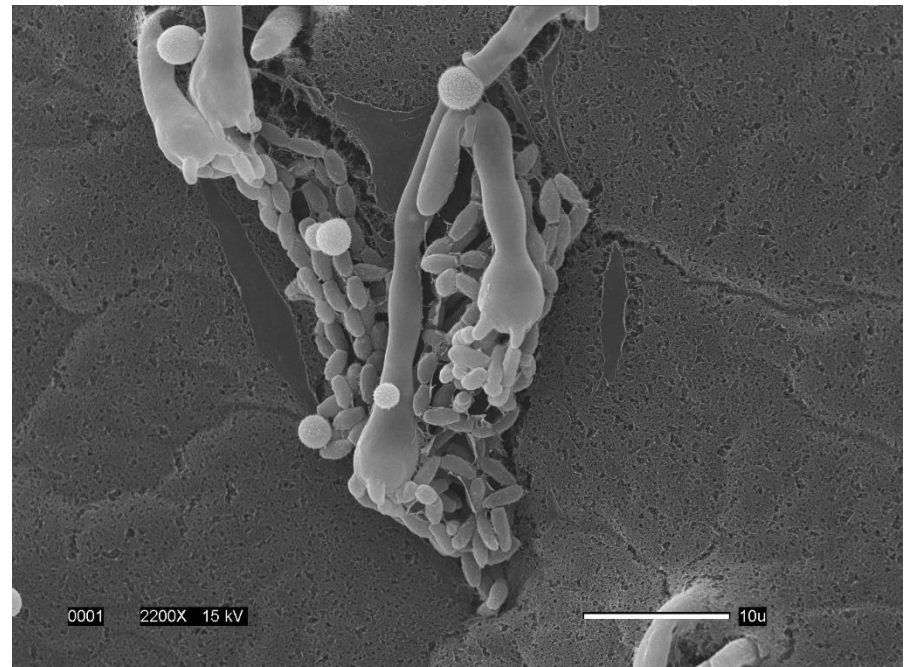



# Morphological analysis of YFF92 x KN99a (only *RPL22a*) strains during mating

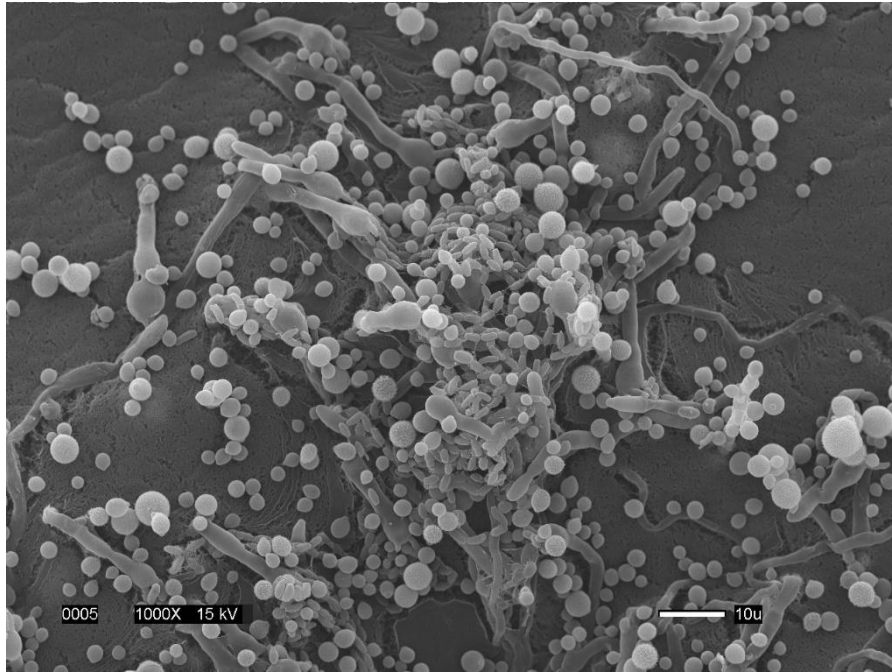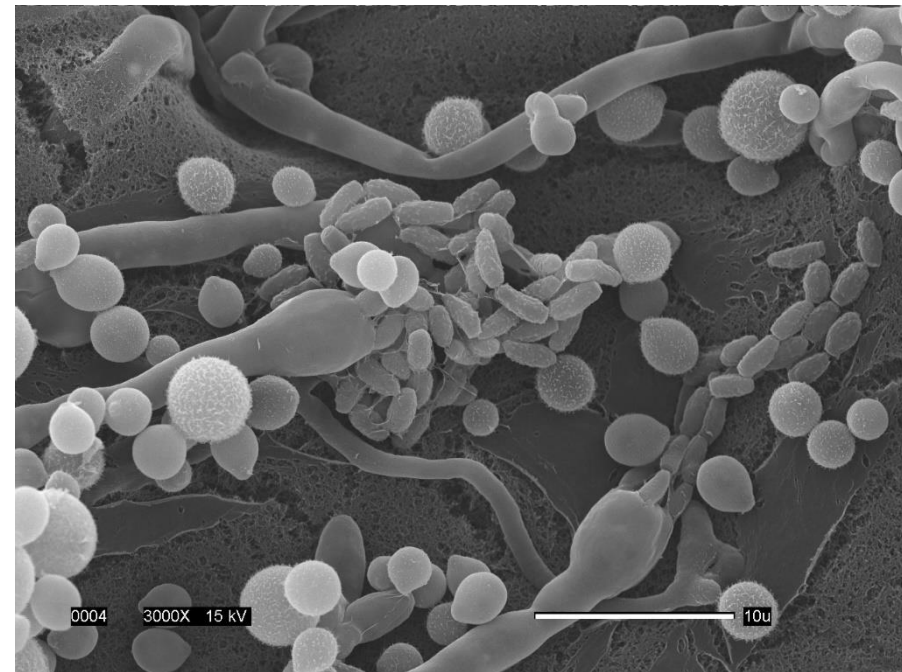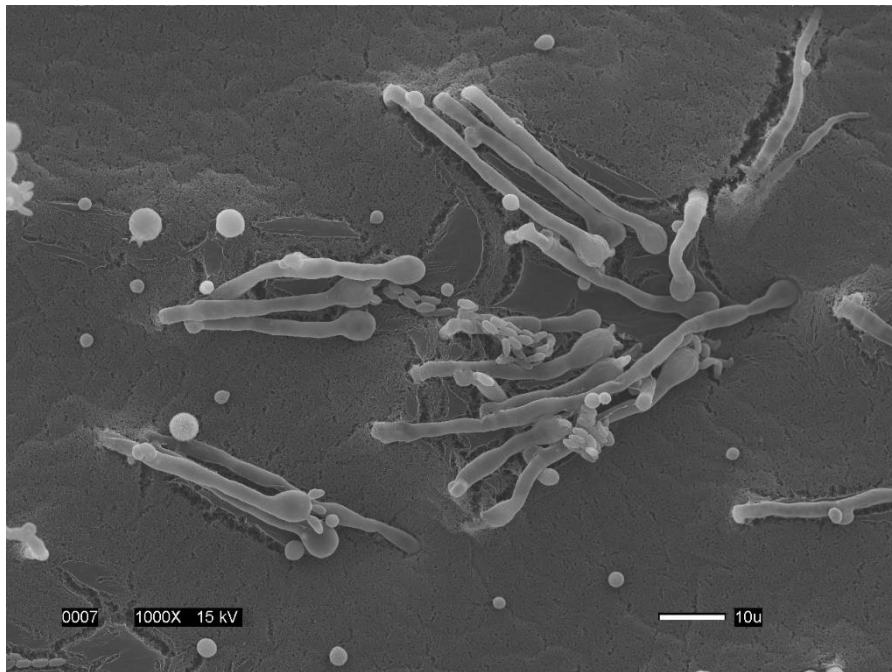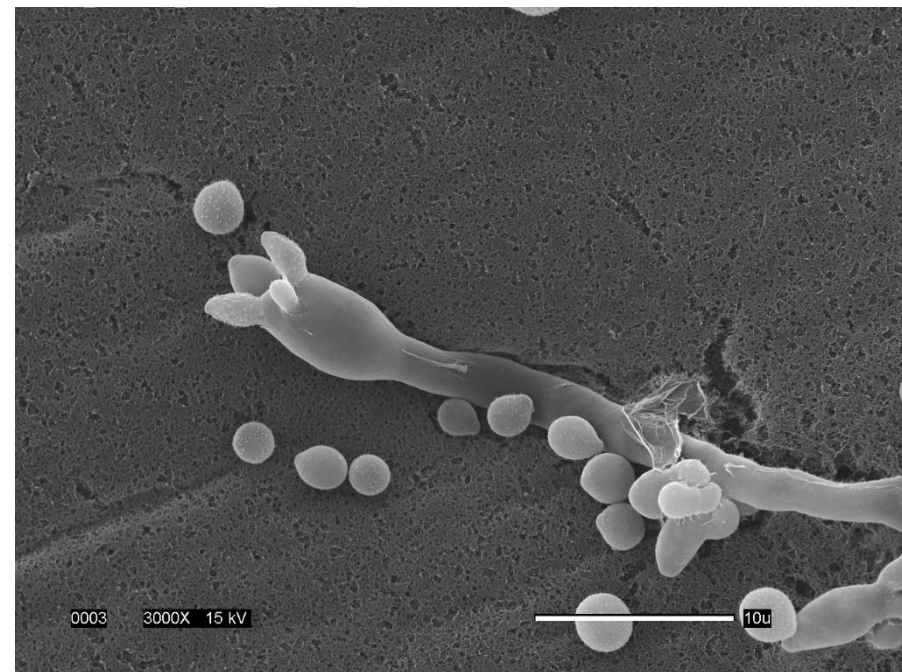



# Morphological analysis of YFF113 x H99 (only *RPL22α*) strains during mating

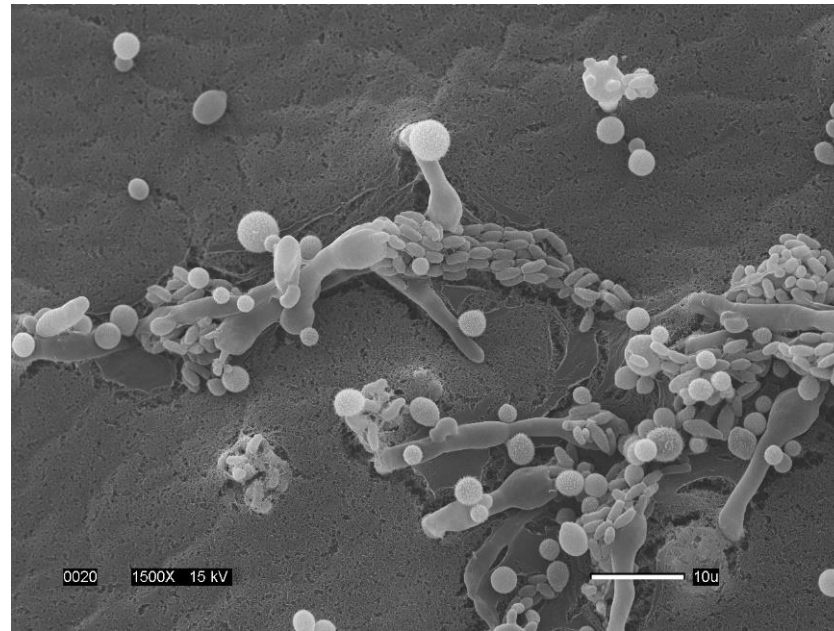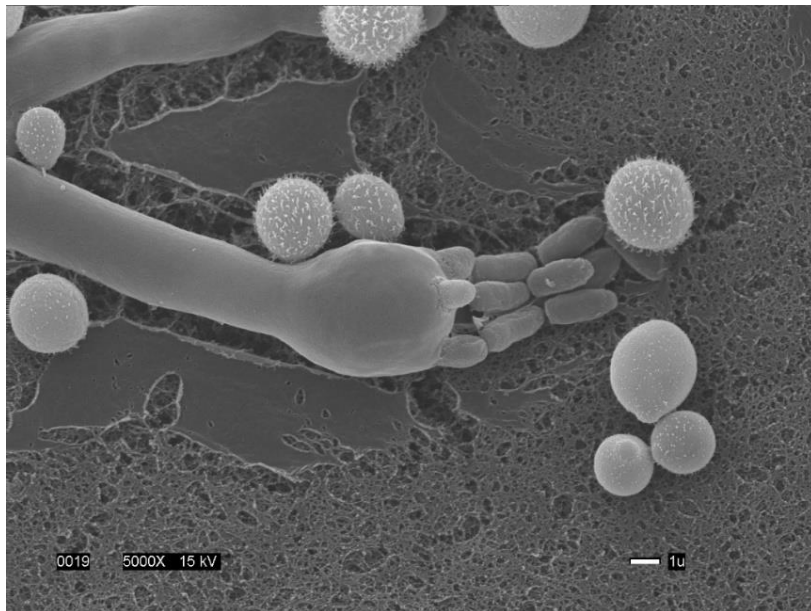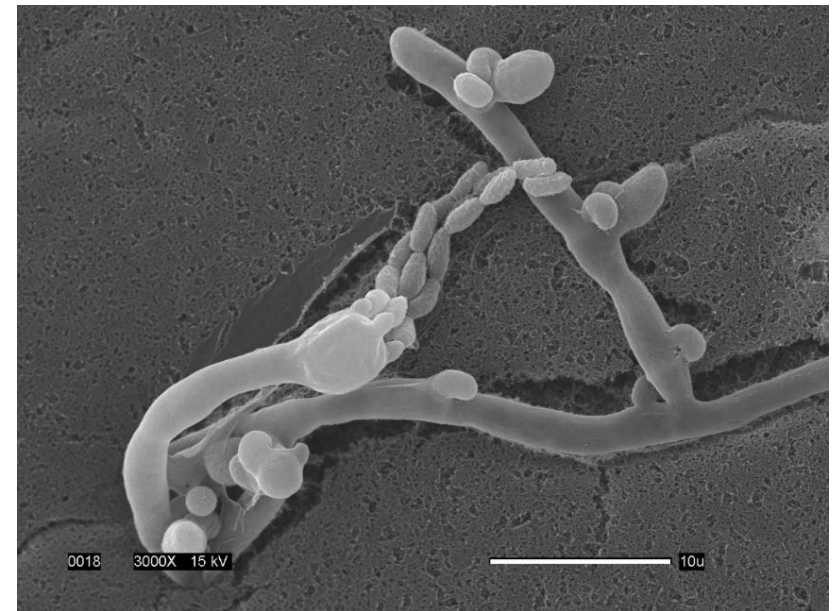



# Morphological analysis of *RPL22* exchange strains (YFF92 x YFF113) during mating

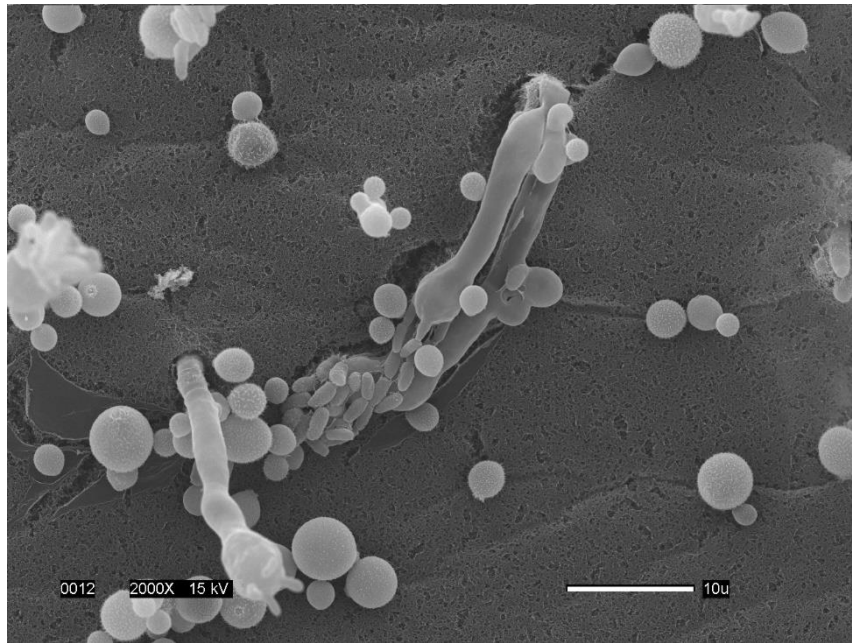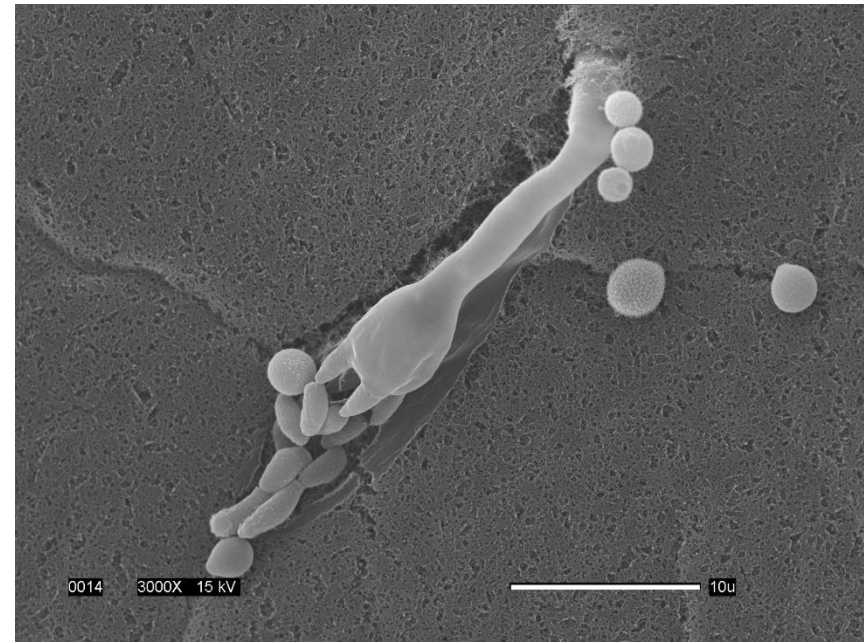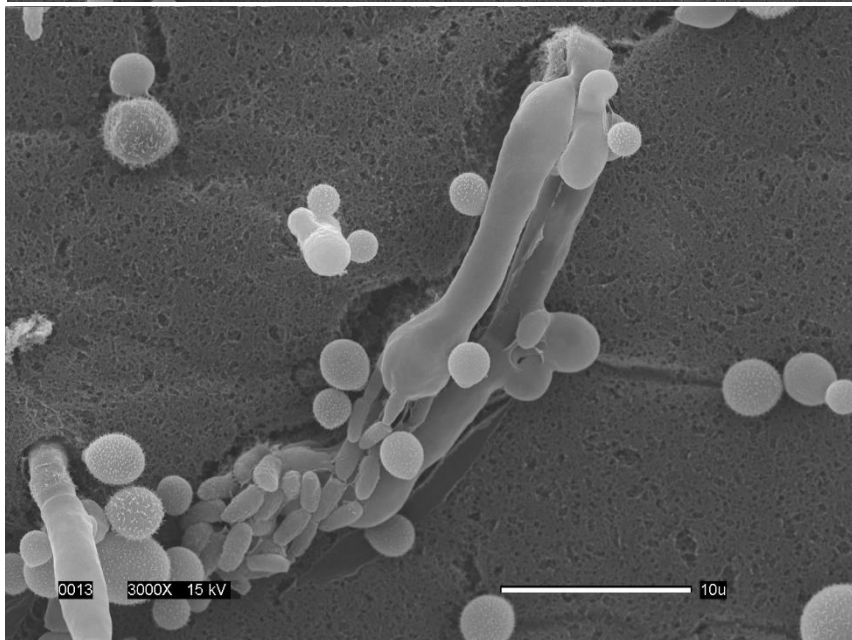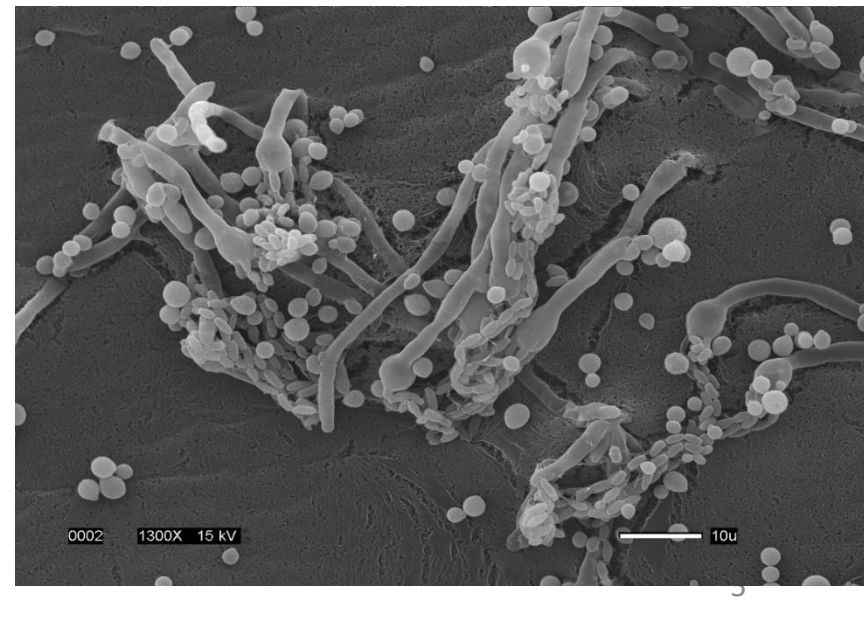

Supplement: Supplementary file 3 [file 1]
